# Supplementary material for: Caring Ability and Professional Values of Polish Nursing Students—A Cross-Sectional Study
Source: MDPI journal article supplement (doi:10.3390/ijerph191811308), 2022-09-08
Supplement: s1 [file s1]

**Table S1. Pairwise comparisons.**

| Sample 1-<br>Sample 2                                                        | Test statistic | SE     | Standardized<br>test statistic | Significance | Bonferroni-<br>adjusted<br>significance |
|------------------------------------------------------------------------------|----------------|--------|--------------------------------|--------------|-----------------------------------------|
| <b>Pairwise comparison between the years of study and Care Subscale.</b>     |                |        |                                |              |                                         |
| 2.00-3.00                                                                    | -36.188        | 13.628 | -2.655                         | .008         | .024                                    |
| 2.00-1.00                                                                    | 37.986         | 14.067 | 2.700                          | .007         | .021                                    |
| 3.00-1.00                                                                    | 1.798          | 13.598 | .132                           | .895         | 1.000                                   |
| <b>Pairwise comparison between the years of study and Knowledge Subscale</b> |                |        |                                |              |                                         |
| 3.00-2.00                                                                    | 26.991         | 13.665 | 1.975                          | .048         | .145                                    |
| 3.00-1.00                                                                    | 36.228         | 13.634 | 2.657                          | .008         | .024                                    |
| 2.00-1.00                                                                    | 9.237          | 14.104 | .655                           | .513         | 1.000                                   |
| <b>Pairwise comparison between the years of study and Courage Subscale</b>   |                |        |                                |              |                                         |
| 3.00-2.00                                                                    | 6.315          | 13.667 | .462                           | .644         | 1.000                                   |
| 3.00-1.00                                                                    | 36.396         | 13.636 | 2.669                          | .008         | .023                                    |
| 2.00-1.00                                                                    | 30.081         | 14.106 | 2.132                          | 0.033        | .099                                    |
| <b>Pairwise comparison between the type of school and Courage Subscale</b>   |                |        |                                |              |                                         |
| 1.00-3.00                                                                    | -22.959        | 13.150 | -1.746                         | .081         | .242                                    |
| 1.00-2.00                                                                    | -40.413        | 14.131 | -2.860                         | .004         | .013                                    |
| 3.00-2.00                                                                    | 15.454         | 15.107 | 1.155                          | 0.248        | .744                                    |
| <b>Pairwise comparison between work and Care Subscale</b>                    |                |        |                                |              |                                         |
| 1.00-3.00                                                                    | -30.776        | 12.319 | -2.498                         | .012         | .037                                    |
| 1.00-2.00                                                                    | -36.804        | 20.096 | -1.831                         | .067         | .201                                    |
| 3.00-2.00                                                                    | 6.028          | 21.193 | .284                           | 0.776        | 1.00                                    |

Each row tests the null hypothesis that the Sample 1 and Sample 2 distributions are the same.

Asymptotic significance (2-sided tests) are displayed.

The significance level is .050.

a. Significance values have been adjusted by the Bonferroni correction for multiple tests.
